# Supplementary material for: Reaction mechanism of the green synthesis of glutaric acid
Source: Royal Society of Chemistry journal article supplement (doi:10.1039/d1ra08650b), 2022-01-01
Supplement: d1ra08650b1.pdf [file d1ra08650b1.pdf]

# Supporting Information

## Experimental sections

**Product glutaric acid purification:** Boiling the reaction mixture to decompose the remaining  $\text{H}_2\text{O}_2$  until it is checked with starch potassium iodide test paper until there is no blue color. Concentrate and remove water by vacuum distillation. When it becomes more concentrated, stop the distillation and fully cool and crystallize. Colorless crystals are obtained by suction filtration, and purified product glutaric acid can be obtained after drying.

## Supporting Figures

**Figure S1.** MS spectra of intermediate 8.

**Figure S2.** IR spectra of solution after reaction.

**Figure S3.** IR spectra of Glutaric acid aqueous solution.

**Figure S4.**  $^1\text{H}$  NMR spectra of product Glutaric acid.

**Figure S5.**  $^{13}\text{C}$  NMR spectra of product Glutaric acid.

**Figure S6.** MS spectra of product Glutaric acid.

## Theoretical calculation part

**Table S1.** Absolute calculation energies and thermodynamic corrections for the optimized geometries and transition states.

ZHAQ

20210824-004 18 (1.842) Cm ((16:19+21:23+11:14))

2: Scan ES+  
1.59e7

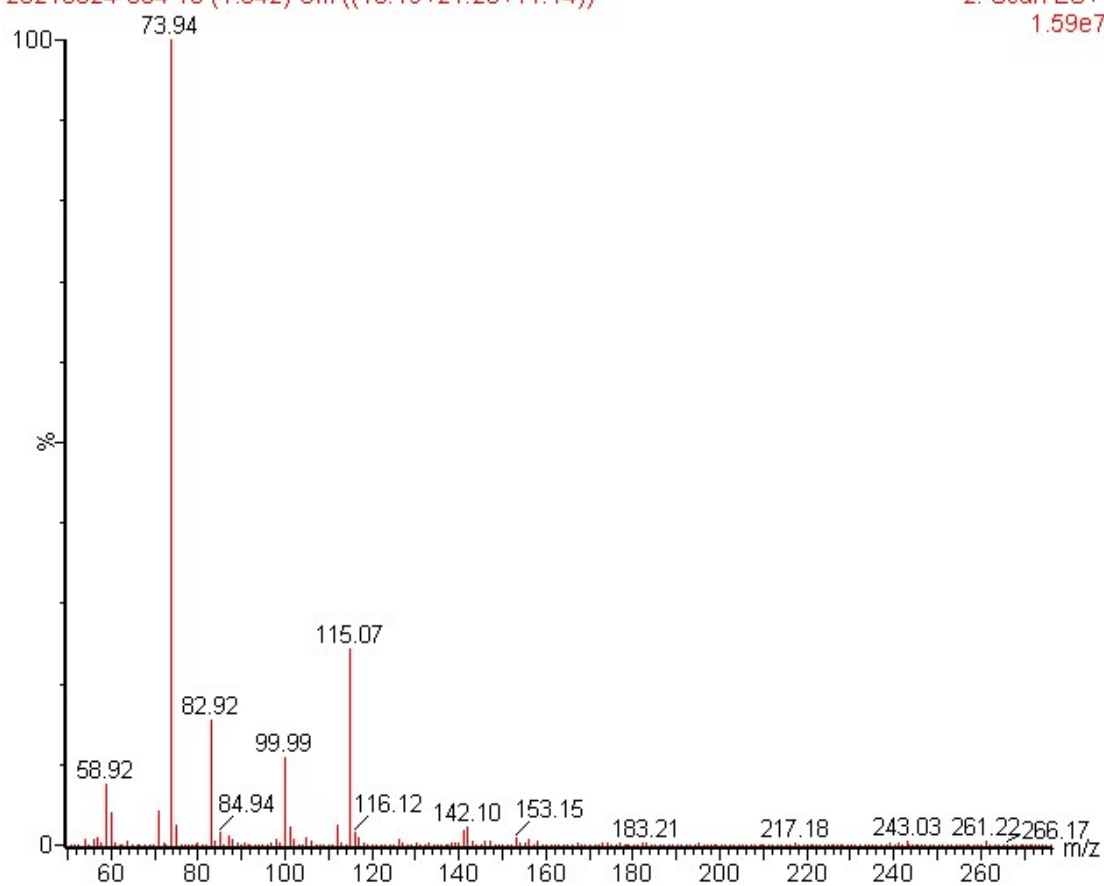

**Figure S1.** Mass spectra of intermediate 8.

**MS,** m/z: 115.07 [M-CH<sub>2</sub>CHOH+C<sub>2</sub>H<sub>3</sub>N]<sup>+</sup>, 99.99 [M-H<sub>2</sub>O]<sup>+</sup>, 84.94 [M-OOH]<sup>+</sup>, 82.92 [M-OH-H<sub>2</sub>O]<sup>+</sup>, 73.94 [M-CH<sub>2</sub>CHOH]<sup>+</sup>.

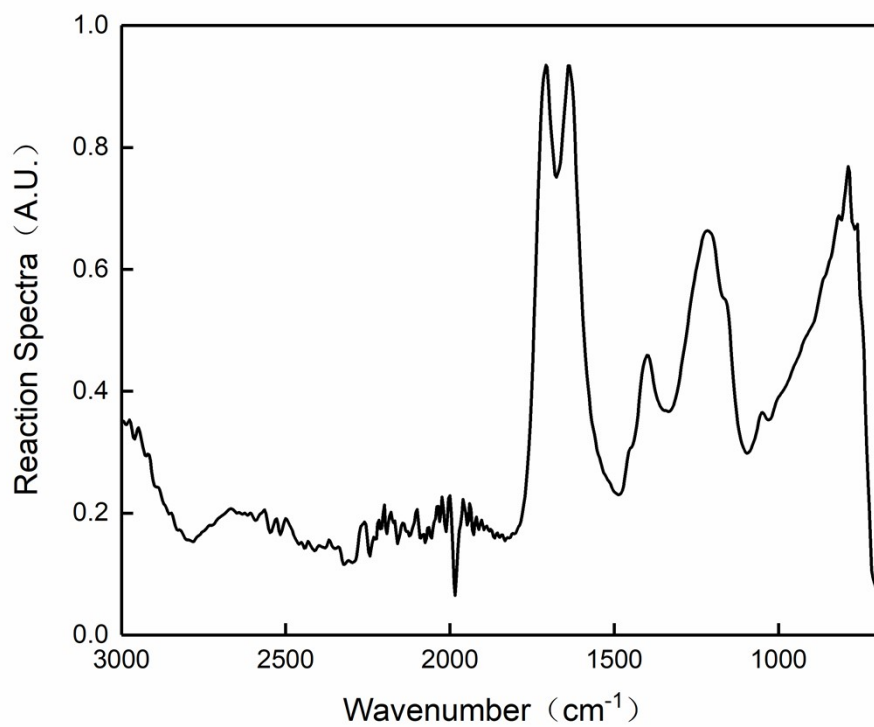

**Figure S2.** IR spectra of solution after reaction.

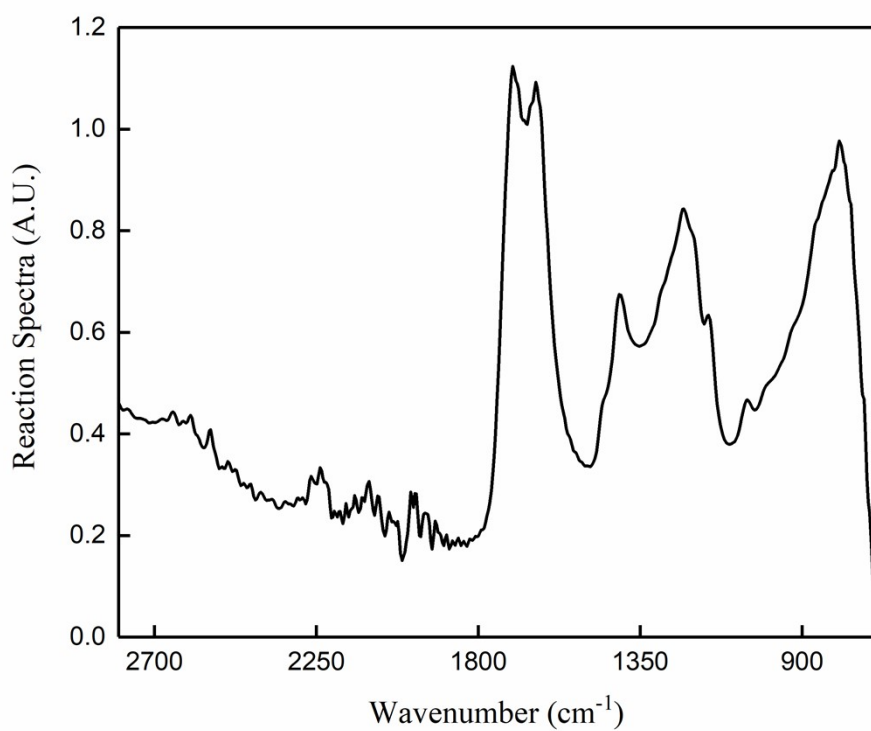

**Figure S3.** IR spectra of Glutaric acid aqueous solution.

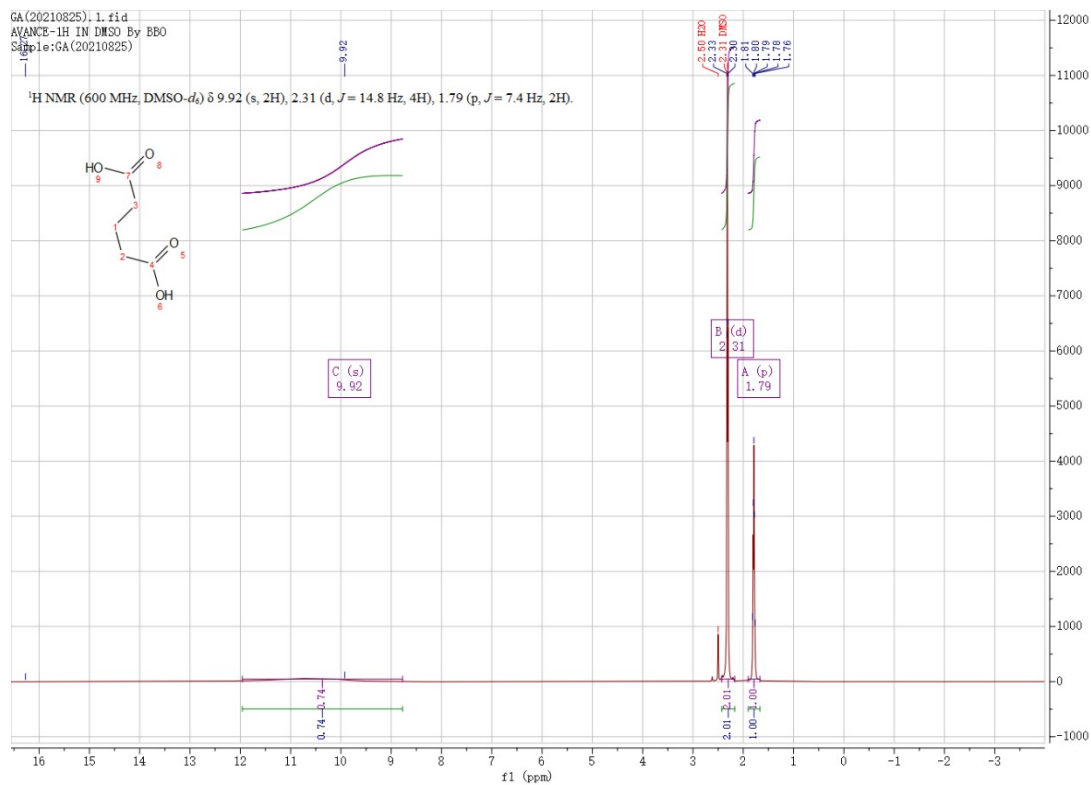

**Figure S4.** <sup>1</sup>H NMR spectra of product Glutaric acid.

<sup>1</sup>H NMR (600 MHz, DMSO-*d*<sub>6</sub>) δ 9.92 (s, 2H), 2.31 (d, *J* = 14.8 Hz, 4H), 1.79 (p, *J* = 7.4 Hz, 2H).

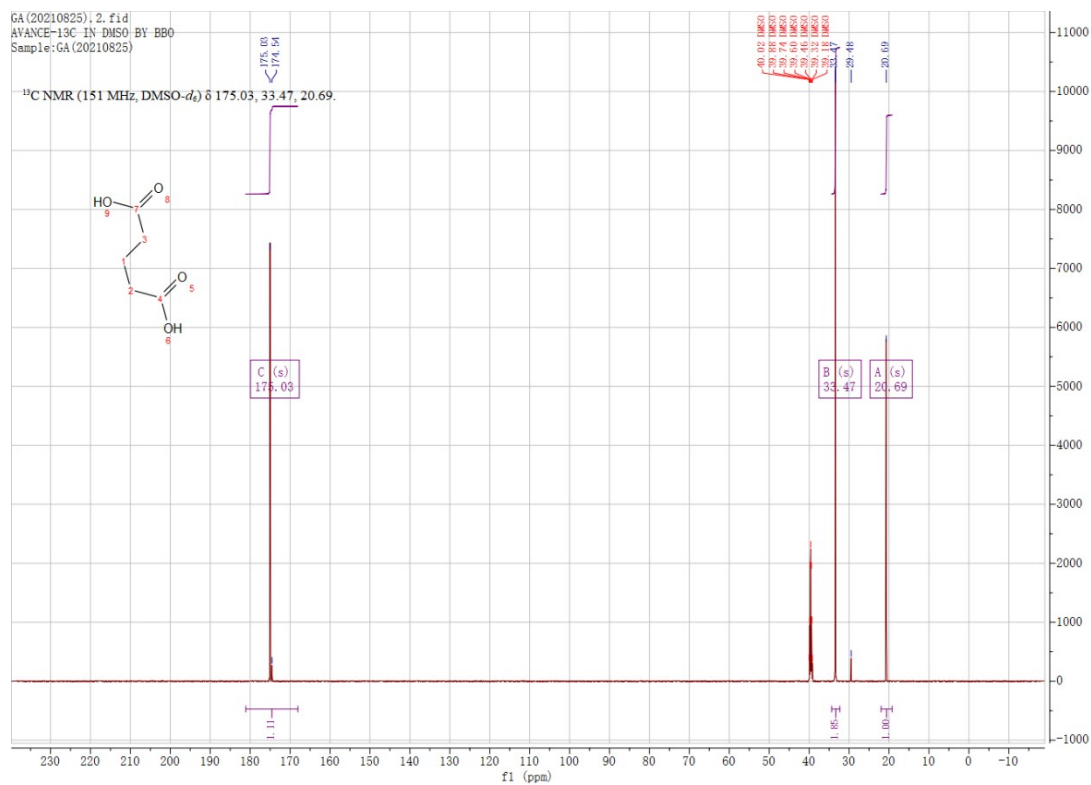

**Figure S5.**  $^{13}\text{C}$  NMR spectra of product Glutaric acid.

$^{13}\text{C}$  NMR (151 MHz,  $\text{DMSO-}d_6$ )  $\delta$  175.03, 33.47, 20.69.

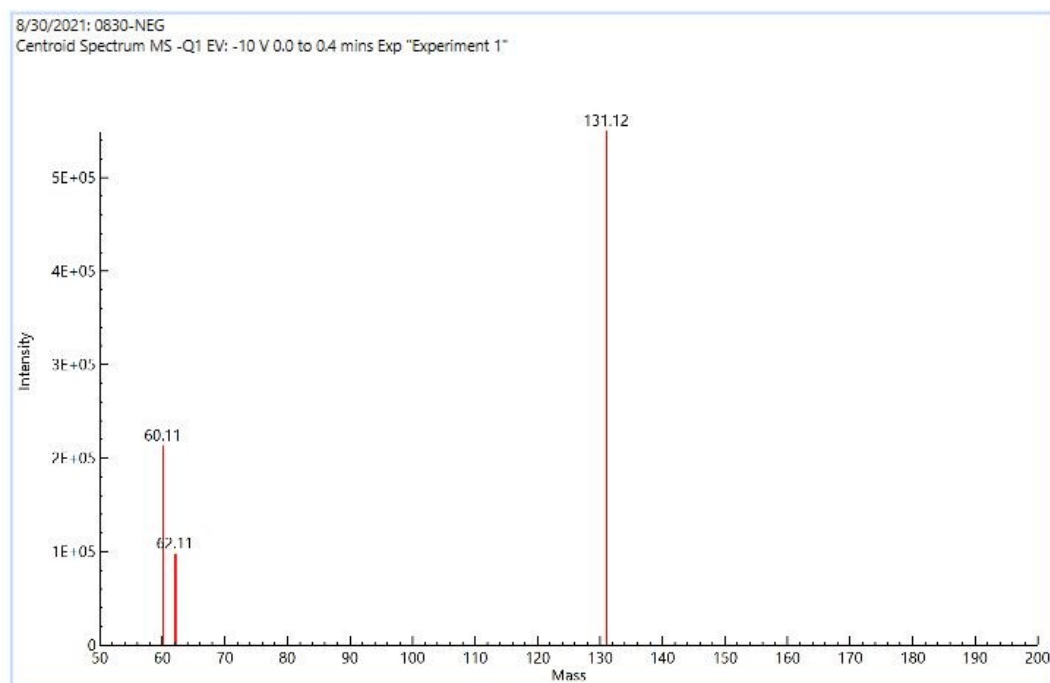

**Figure S6.** MS spectra of product Glutaric acid.

**Table S1.** Absolute calculation energies and thermodynamic corrections for the optimized geometries and transition states.

|            | E           | Corr. (ZPE) | Corr. (H) | Corr. (G) |
|------------|-------------|-------------|-----------|-----------|
| Initiators | -347.148752 | 0.161083    | 0.170170  | 0.128331  |
| TS         | -347.146885 | 0.159966    | 0.168794  | 0.127480  |
| Int-1      | -347.148750 | 0.161101    | 0.170177  | 0.128400  |
| Int-1      | -422.239326 | 0.166214    | 0.176189  | 0.131736  |
| TS2        | -347.134753 | 0.163633    | 0.171312  | 0.133379  |
| TS2        | -422.224914 | 0.167599    | 0.176400  | 0.135399  |
| Int-23     | -347.135571 | 0.163651    | 0.172368  | 0.131324  |
| Int-28     | -422.225388 | 0.167677    | 0.177387  | 0.133688  |
